# Supplementary material for: Bone Marrow Mesenchymal Stem Cell-Derived Exosomes Inhibit Triple-Negative Breast Cancer Cell Stemness and Metastasis via an ALKBH5-Dependent Mechanism
Source: MDPI journal article supplement (doi:10.3390/cancers14246059), 2022-12-09
Supplement: s1 [file s1]

**Supplementary Table S1.** Primer sequences for qRT-PCR

| Gene           | Sequence                               |
|----------------|----------------------------------------|
| ALKBH5 (human) | Forward: 5'-GCTGGTTGCTCCTTTTGAGC-3'    |
|                | Reverse: 5'-CTTGGAAGGACACCAGTCCC-3'    |
| UBE2C (human)  | Forward: 5'-GATGACCCTCATGGCAGTGG-3'    |
|                | Reverse: 5'-CACACAAGGGGCTTGCTAGA-3'    |
| TP53 (human)   | Forward: 5'-ACCTATGGAACTACTTCCTGAAA-3' |
|                | Reverse: 5'-ACCATCGCTATCTGAGCAGC-3'    |
| GAPDH (human)  | Forward: 5'-TCAGACACCATGGGGAAGGT-3'    |
|                | Reverse: 5'-TCCCGTTCTCAGCCATGTAG-3'    |
